# Supplementary material for: IgA Staining Patterns Differentiate Between IgA Nephropathy and IgA-Dominant Infection-Associated Glomerulonephritis
Source: PubMed Central journal article supplement — Kidney Int Rep. 2020 Apr 11;5(6):909–11. doi: 10.1016/j.ekir.2020.03.029 (PMC7270975; doi:10.1016/j.ekir.2020.03.029), 2020-04-11
Supplement: mmc1.pdf [file mmc1.pdf]

**Material and methods:**

We had characterize a large cohort of patients with culture-proven SAGN<sup>3, 6</sup>. This cohort was included into this study, as well as recent cases with IgAN and SAGN. Biopsies that had both sclerosing and non-sclerosing glomeruli in the frozen section were selected (total n=75; 45 with IgA nephropathy and 30 with SAGN). Since the sclerotic glomeruli had not been imaged during routine pathologic examination, we repeated direct immunofluorescence with fluorescein conjugated antiserum to human IgA (Kent Laboratories, Bellingham, WA, catalog # 102202) on the archived frozen tissue and paraffin embedded tissue and evaluated both sclerotic and non-sclerotic glomeruli in these biopsies. Immunofluorescence was performed on a Biocare Intellipath stainer (Biocare Medical, Pacheco, CA). Antigen retrieval in the paraffin embedded tissue was performed with Dako Proteinase K (catalog # S3020) for 9 minutes in a microwave. Sensitivity and specificity of the staining in sclerosed glomeruli were calculated.
